# Supplementary material for: Low contact resistance in carbon nanotube devices: metal-induced gap states
Source: Royal Society of Chemistry journal article supplement (doi:10.1039/d4cp02938k), 2024-11-28
Supplement: d4cp02938k1.pdf [file d4cp02938k1.pdf]

## Supplementary Information

### Atomic coordinates of DCS

| AtomType | X           | Y           | Z           |
|----------|-------------|-------------|-------------|
| C        | 12.07614165 | 8.87130905  | 46.38232848 |
| C        | 9.23419217  | 8.87130905  | 46.38232848 |
| C        | 17.76019127 | 8.87134121  | 46.38233002 |
| C        | 20.60214072 | 8.87134121  | 46.38233002 |
| C        | 11.36565427 | 8.87130905  | 47.61293076 |
| C        | 9.94467955  | 8.87130905  | 47.61293076 |
| C        | 18.47067858 | 8.87134121  | 47.61293228 |
| C        | 19.89165334 | 8.87134121  | 47.61293228 |
| C        | 12.07614165 | 8.87130905  | 48.84352919 |
| C        | 9.23419217  | 8.87130905  | 48.84352919 |
| C        | 17.76019127 | 8.87134121  | 48.84353073 |
| C        | 20.60214072 | 8.87134121  | 48.84353073 |
| C        | 13.4972715  | 8.87134121  | 46.38233002 |
| C        | 16.33922    | 8.87134121  | 46.38233002 |
| C        | 14.20775886 | 8.87134121  | 47.61293228 |
| C        | 15.62873263 | 8.87134121  | 47.61293228 |
| C        | 13.4972715  | 8.87134121  | 48.84353073 |
| C        | 16.33922    | 8.87134121  | 48.84353073 |
| C        | 14.91816599 | 8.87132085  | 21.7923947  |
| C        | 12.61573978 | 9.61942446  | 21.7923947  |
| C        | 17.22059222 | 9.61942446  | 21.7923947  |
| C        | 11.19276211 | 11.57798517 | 21.7923947  |
| C        | 18.64356988 | 11.57798517 | 21.7923947  |
| C        | 11.19276211 | 13.9988994  | 21.7923947  |
| C        | 18.64356988 | 13.9988994  | 21.7923947  |
| C        | 12.61573978 | 15.95746011 | 21.7923947  |
| C        | 17.22059222 | 15.95746011 | 21.7923947  |
| C        | 14.91816599 | 16.70556375 | 21.7923947  |
| C        | 13.70770892 | 9.06303841  | 22.50288193 |
| C        | 16.12862312 | 9.06303841  | 22.50288193 |
| C        | 11.7491482  | 10.48601606 | 22.50288193 |
| C        | 18.08718383 | 10.48601607 | 22.50288193 |
| C        | 11.00104456 | 12.78844226 | 22.50288193 |
| C        | 18.83528746 | 12.78844231 | 22.50288193 |
| C        | 11.74914815 | 15.0908685  | 22.50288193 |
| C        | 18.08718382 | 15.09086855 | 22.50288193 |
| C        | 13.70770888 | 16.5138462  | 22.50288193 |
| C        | 16.12862309 | 16.5138462  | 22.50288193 |
| C        | 13.70770892 | 9.06303841  | 23.92385638 |

|   |             |             |             |
|---|-------------|-------------|-------------|
| C | 16.12862312 | 9.06303841  | 23.92385638 |
| C | 11.74914815 | 15.0908685  | 23.92385638 |
| C | 18.08718382 | 15.09086855 | 23.92385638 |
| C | 13.70770888 | 16.5138462  | 23.92385638 |
| C | 16.12862309 | 16.5138462  | 23.92385638 |
| C | 11.7491482  | 10.48601606 | 23.92385642 |
| C | 18.08718383 | 10.48601607 | 23.92385642 |
| C | 11.00104456 | 12.78844226 | 23.92385642 |
| C | 18.83528746 | 12.78844231 | 23.92385642 |
| C | 14.91816599 | 8.87132085  | 24.63434363 |
| C | 12.61573978 | 9.61942446  | 24.63434363 |
| C | 17.22059222 | 9.61942446  | 24.63434363 |
| C | 11.19276211 | 11.57798517 | 24.63434363 |
| C | 18.64356988 | 11.57798517 | 24.63434363 |
| C | 11.19276211 | 13.9988994  | 24.63434363 |
| C | 18.64356988 | 13.9988994  | 24.63434363 |
| C | 12.61573978 | 15.95746011 | 24.63434363 |
| C | 17.22059222 | 15.95746011 | 24.63434363 |
| C | 14.91816599 | 16.70556375 | 24.63434363 |
| C | 14.91816599 | 8.87132085  | 26.05516506 |
| C | 12.61573978 | 9.61942446  | 26.05516506 |
| C | 17.22059222 | 9.61942446  | 26.05516506 |
| C | 11.19276211 | 11.57798517 | 26.05516506 |
| C | 18.64356988 | 11.57798517 | 26.05516506 |
| C | 11.19276211 | 13.9988994  | 26.05516506 |
| C | 18.64356988 | 13.9988994  | 26.05516506 |
| C | 12.61573978 | 15.95746011 | 26.05516506 |
| C | 17.22059222 | 15.95746011 | 26.05516506 |
| C | 14.91816599 | 16.70556375 | 26.05516506 |
| C | 13.70770892 | 9.06303841  | 26.76565231 |
| C | 16.12862312 | 9.06303841  | 26.76565231 |
| C | 11.7491482  | 10.48601606 | 26.76565231 |
| C | 18.08718383 | 10.48601607 | 26.76565231 |
| C | 11.00104456 | 12.78844226 | 26.76565231 |
| C | 18.83528746 | 12.78844231 | 26.76565231 |
| C | 11.74914815 | 15.0908685  | 26.76565231 |
| C | 18.08718382 | 15.09086855 | 26.76565231 |
| C | 13.70770888 | 16.5138462  | 26.76565231 |
| C | 16.12862309 | 16.5138462  | 26.76565231 |
| C | 13.70770892 | 9.06303841  | 28.18662678 |
| C | 16.12862312 | 9.06303841  | 28.18662678 |
| C | 11.74914815 | 15.0908685  | 28.18662678 |
| C | 18.08718382 | 15.09086855 | 28.18662678 |
| C | 13.70770888 | 16.5138462  | 28.18662678 |

|   |             |             |             |
|---|-------------|-------------|-------------|
| C | 16.12862309 | 16.5138462  | 28.18662678 |
| C | 11.7491482  | 10.48601606 | 28.18662678 |
| C | 18.08718383 | 10.48601607 | 28.18662678 |
| C | 11.00104456 | 12.78844226 | 28.18662678 |
| C | 18.83528746 | 12.78844231 | 28.18662678 |
| C | 14.91816599 | 8.87132085  | 28.89711404 |
| C | 12.61573978 | 9.61942446  | 28.89711404 |
| C | 17.22059222 | 9.61942446  | 28.89711404 |
| C | 11.19276211 | 11.57798517 | 28.89711404 |
| C | 18.64356988 | 11.57798517 | 28.89711404 |
| C | 11.19276211 | 13.9988994  | 28.89711404 |
| C | 18.64356988 | 13.9988994  | 28.89711404 |
| C | 12.61573978 | 15.95746011 | 28.89711404 |
| C | 17.22059222 | 15.95746011 | 28.89711404 |
| C | 14.91816599 | 16.70556375 | 28.89711404 |
| C | 14.91816599 | 8.87132085  | 30.31808854 |
| C | 12.61573978 | 9.61942446  | 30.31808854 |
| C | 17.22059222 | 9.61942446  | 30.31808854 |
| C | 11.19276211 | 11.57798517 | 30.31808854 |
| C | 18.64356988 | 11.57798517 | 30.31808854 |
| C | 11.19276211 | 13.9988994  | 30.31808854 |
| C | 18.64356988 | 13.9988994  | 30.31808854 |
| C | 12.61573978 | 15.95746011 | 30.31808854 |
| C | 17.22059222 | 15.95746011 | 30.31808854 |
| C | 14.91816599 | 16.70556375 | 30.31808854 |
| C | 13.70770892 | 9.06303841  | 31.02857578 |
| C | 16.12862312 | 9.06303841  | 31.02857578 |
| C | 11.7491482  | 10.48601606 | 31.02857578 |
| C | 18.08718383 | 10.48601607 | 31.02857578 |
| C | 11.00104456 | 12.78844226 | 31.02857578 |
| C | 18.83528746 | 12.78844231 | 31.02857578 |
| C | 11.74914815 | 15.0908685  | 31.02857578 |
| C | 18.08718382 | 15.09086855 | 31.02857578 |
| C | 13.70770888 | 16.5138462  | 31.02857578 |
| C | 16.12862309 | 16.5138462  | 31.02857578 |
| C | 13.70770892 | 9.06303841  | 32.44955021 |
| C | 16.12862312 | 9.06303841  | 32.44955021 |
| C | 11.74914815 | 15.0908685  | 32.44955021 |
| C | 18.08718382 | 15.09086855 | 32.44955021 |
| C | 13.70770888 | 16.5138462  | 32.44955021 |
| C | 16.12862309 | 16.5138462  | 32.44955021 |
| C | 11.7491482  | 10.48601606 | 32.44955023 |
| C | 18.08718383 | 10.48601607 | 32.44955023 |
| C | 11.00104456 | 12.78844226 | 32.44955023 |

|   |             |             |             |
|---|-------------|-------------|-------------|
| C | 18.83528746 | 12.78844231 | 32.44955023 |
| C | 14.91816599 | 8.87132085  | 33.16003746 |
| C | 12.61573978 | 9.61942446  | 33.16003746 |
| C | 17.22059222 | 9.61942446  | 33.16003746 |
| C | 11.19276211 | 11.57798517 | 33.16003746 |
| C | 18.64356988 | 11.57798517 | 33.16003746 |
| C | 11.19276211 | 13.9988994  | 33.16003746 |
| C | 18.64356988 | 13.9988994  | 33.16003746 |
| C | 12.61573978 | 15.95746011 | 33.16003746 |
| C | 17.22059222 | 15.95746011 | 33.16003746 |
| C | 14.91816599 | 16.70556375 | 33.16003746 |
| C | 22.02311548 | 8.87134121  | 48.8435297  |
| C | 22.73360285 | 8.87134121  | 47.61293033 |
| C | 22.02311548 | 8.87134121  | 46.38232994 |
| C | 22.73360285 | 8.87134121  | 45.15172962 |
| C | 22.02311548 | 8.87134121  | 43.92113019 |
| C | 22.73360285 | 8.87134121  | 42.6905308  |
| C | 22.02311548 | 8.87134121  | 41.4599304  |
| C | 22.7335193  | 8.87134121  | 40.22933009 |
| C | 7.81319218  | 8.87134121  | 48.8435297  |
| C | 7.10270479  | 8.87134121  | 47.61293033 |
| C | 7.81319218  | 8.87134121  | 46.38232994 |
| C | 7.10270479  | 8.87134121  | 45.15172962 |
| C | 7.81319218  | 8.87134121  | 43.92113019 |
| C | 7.10270479  | 8.87134121  | 42.6905308  |
| C | 7.81319218  | 8.87134121  | 41.4599304  |
| C | 7.10278837  | 8.87134121  | 40.22933009 |
| C | 12.07614165 | 8.87130905  | 4.3071037   |
| C | 9.23419217  | 8.87130905  | 4.3071037   |
| C | 17.76019127 | 8.87134121  | 4.30710216  |
| C | 20.60214072 | 8.87134121  | 4.30710216  |
| C | 11.36565427 | 8.87130905  | 3.07650142  |
| C | 9.94467955  | 8.87130905  | 3.07650142  |
| C | 18.47067858 | 8.87134121  | 3.07649992  |
| C | 19.89165334 | 8.87134121  | 3.07649992  |
| C | 12.07614165 | 8.87130905  | 1.845903    |
| C | 9.23419217  | 8.87130905  | 1.845903    |
| C | 17.76019127 | 8.87134121  | 1.84590143  |
| C | 20.60214072 | 8.87134121  | 1.84590143  |
| C | 13.4972715  | 8.87134121  | 4.30710216  |
| C | 16.33922    | 8.87134121  | 4.30710216  |
| C | 14.20775886 | 8.87134121  | 3.07649992  |
| C | 15.62873263 | 8.87134121  | 3.07649992  |
| C | 13.4972715  | 8.87134121  | 1.84590143  |

|   |             |             |             |
|---|-------------|-------------|-------------|
| C | 16.33922    | 8.87134121  | 1.84590143  |
| C | 22.02311548 | 8.87134121  | 1.84590245  |
| C | 22.73360285 | 8.87134121  | 3.07650186  |
| C | 22.02311548 | 8.87134121  | 4.3071022   |
| C | 22.73360285 | 8.87134121  | 5.53770257  |
| C | 22.02311548 | 8.87134121  | 6.76830199  |
| C | 22.73360285 | 8.87134121  | 7.9989014   |
| C | 22.02311548 | 8.87134121  | 9.22950173  |
| C | 22.7335193  | 8.87134121  | 10.46010209 |
| C | 7.81319218  | 8.87134121  | 1.84590245  |
| C | 7.10270479  | 8.87134121  | 3.07650186  |
| C | 7.81319218  | 8.87134121  | 4.3071022   |
| C | 7.10270479  | 8.87134121  | 5.53770257  |
| C | 7.81319218  | 8.87134121  | 6.76830199  |
| C | 7.10270479  | 8.87134121  | 7.9989014   |
| C | 7.81319218  | 8.87134121  | 9.22950173  |
| C | 7.10278837  | 8.87134121  | 10.46010209 |
| C | 22.02311548 | 8.87134121  | 11.69050175 |
| C | 7.81319218  | 8.87134121  | 11.69050175 |
| C | 22.02311548 | 8.87134121  | 38.99893042 |
| C | 7.81319218  | 8.87134121  | 38.99893042 |
| C | 22.7335193  | 8.87134121  | 12.92010208 |
| C | 7.10278837  | 8.87134121  | 12.92010208 |
| C | 22.7335193  | 8.87134121  | 37.7693301  |
| C | 7.10278837  | 8.87134121  | 37.7693301  |
| C | 14.91816599 | 8.87132085  | 17.52944578 |
| C | 12.61573978 | 9.61942446  | 17.52944578 |
| C | 17.22059222 | 9.61942446  | 17.52944578 |
| C | 11.19276211 | 11.57798517 | 17.52944578 |
| C | 18.64356988 | 11.57798517 | 17.52944578 |
| C | 11.19276211 | 13.9988994  | 17.52944578 |
| C | 18.64356988 | 13.9988994  | 17.52944578 |
| C | 12.61573978 | 15.95746011 | 17.52944578 |
| C | 17.22059222 | 15.95746011 | 17.52944578 |
| C | 14.91816599 | 16.70556375 | 17.52944578 |
| C | 13.70770892 | 9.06303841  | 18.23993299 |
| C | 16.12862312 | 9.06303841  | 18.23993299 |
| C | 11.7491482  | 10.48601606 | 18.23993299 |
| C | 18.08718383 | 10.48601607 | 18.23993299 |
| C | 11.00104456 | 12.78844226 | 18.23993299 |
| C | 18.83528746 | 12.78844231 | 18.23993299 |
| C | 11.74914815 | 15.0908685  | 18.23993299 |
| C | 18.08718382 | 15.09086855 | 18.23993299 |
| C | 13.70770888 | 16.5138462  | 18.23993299 |

|   |             |             |             |
|---|-------------|-------------|-------------|
| C | 16.12862309 | 16.5138462  | 18.23993299 |
| C | 13.70770892 | 9.06303841  | 19.66090745 |
| C | 16.12862312 | 9.06303841  | 19.66090745 |
| C | 11.74914815 | 15.0908685  | 19.66090745 |
| C | 18.08718382 | 15.09086855 | 19.66090745 |
| C | 13.70770888 | 16.5138462  | 19.66090745 |
| C | 16.12862309 | 16.5138462  | 19.66090745 |
| C | 11.7491482  | 10.48601606 | 19.66090749 |
| C | 18.08718383 | 10.48601607 | 19.66090749 |
| C | 11.00104456 | 12.78844226 | 19.66090749 |
| C | 18.83528746 | 12.78844231 | 19.66090749 |
| C | 14.91816599 | 8.87132085  | 20.3713947  |
| C | 12.61573978 | 9.61942446  | 20.3713947  |
| C | 17.22059222 | 9.61942446  | 20.3713947  |
| C | 11.19276211 | 11.57798517 | 20.3713947  |
| C | 18.64356988 | 11.57798517 | 20.3713947  |
| C | 11.19276211 | 13.9988994  | 20.3713947  |
| C | 18.64356988 | 13.9988994  | 20.3713947  |
| C | 12.61573978 | 15.95746011 | 20.3713947  |
| C | 17.22059222 | 15.95746011 | 20.3713947  |
| C | 14.91816599 | 16.70556375 | 20.3713947  |
| C | 11.36563849 | 8.87131181  | 5.53770066  |
| C | 14.20758153 | 8.87131181  | 5.53770066  |
| C | 9.94464038  | 8.87135141  | 5.53770066  |
| C | 15.62871298 | 8.87135141  | 5.53770066  |
| C | 18.47068142 | 8.87135141  | 5.53770066  |
| C | 19.89165334 | 8.87135141  | 5.53770066  |
| C | 13.48529857 | 8.84412023  | 6.71493234  |
| C | 16.35102213 | 8.84415982  | 6.71493234  |
| C | 12.07077119 | 8.86091879  | 6.72760986  |
| C | 17.76554872 | 8.8609389   | 6.72760986  |
| C | 9.23415481  | 8.87135141  | 6.76831027  |
| C | 20.6021401  | 8.87135141  | 6.76831027  |
| C | 15.61872632 | 8.78626563  | 7.94634002  |
| C | 14.21756819 | 8.78622603  | 7.94636278  |
| C | 11.37157746 | 8.82851091  | 7.95457119  |
| C | 18.46474324 | 8.82853101  | 7.95457119  |
| C | 9.94464038  | 8.87135141  | 7.99889708  |
| C | 19.89165334 | 8.87135141  | 7.99889708  |
| C | 12.10477884 | 8.67377075  | 9.16080613  |
| C | 17.73151488 | 8.67381034  | 9.16080613  |
| C | 13.52034433 | 8.68646366  | 9.18150977  |
| C | 16.31610971 | 8.68646366  | 9.18150977  |
| C | 9.23415481  | 8.87131181  | 9.22950648  |

|   |             |             |             |
|---|-------------|-------------|-------------|
| C | 20.60211311 | 8.87135141  | 9.22950648  |
| C | 19.86174655 | 8.72593263  | 10.25798229 |
| C | 9.9744936   | 8.72595213  | 10.25802851 |
| C | 11.40619782 | 8.5041152   | 10.35949419 |
| C | 18.43017606 | 8.5041152   | 10.3595397  |
| C | 15.6316154  | 8.60036713  | 10.4271912  |
| C | 14.20481165 | 8.60038663  | 10.42725984 |
| C | 12.11125037 | 8.26849363  | 11.57398305 |
| C | 17.72509732 | 8.26851372  | 11.57398305 |
| C | 16.35562934 | 8.46661039  | 11.65442606 |
| C | 13.48069136 | 8.46662991  | 11.65447158 |
| C | 9.24227716  | 8.84501276  | 11.6929603  |
| C | 20.59396378 | 8.84501276  | 11.69305133 |
| C | 11.26862197 | 8.08326954  | 12.80529919 |
| C | 18.56769874 | 8.08326954  | 12.80529919 |
| C | 14.21738168 | 8.36879152  | 12.90231937 |
| C | 15.6189922  | 8.36879152  | 12.90234181 |
| C | 12.5190231  | 16.06117471 | 12.96493146 |
| C | 17.31732459 | 16.06111559 | 12.96495456 |
| C | 11.11775782 | 13.96981728 | 12.96664184 |
| C | 18.7185359  | 13.9698362  | 12.96664184 |
| C | 14.91812067 | 16.91673045 | 12.96830601 |
| C | 10.91562942 | 11.34503835 | 13.01988248 |
| C | 18.92063732 | 11.34507795 | 13.01988248 |
| C | 9.70384394  | 8.127002    | 13.24139769 |
| C | 20.13250296 | 8.127002    | 13.24139769 |
| C | 17.84714676 | 8.97119299  | 13.74138446 |
| C | 11.98912157 | 8.97117289  | 13.74143    |
| C | 18.92894697 | 12.65456225 | 13.85272306 |
| C | 10.9074539  | 12.65454215 | 13.85274617 |
| C | 18.16788962 | 15.07493647 | 13.88863565 |
| C | 11.66840489 | 15.07491637 | 13.88865808 |
| C | 13.6631663  | 16.62299657 | 13.90448236 |
| C | 16.17307504 | 16.62301667 | 13.90450477 |
| C | 11.42949975 | 10.27252506 | 14.01269715 |
| C | 18.40679476 | 10.27246537 | 14.01274267 |
| C | 13.45352747 | 8.72386975  | 14.06251839 |
| C | 16.38268689 | 8.72386975  | 14.06254081 |
| C | 13.70766616 | 9.06306144  | 15.44710501 |
| C | 16.12862756 | 9.06306144  | 15.44710501 |
| C | 11.74912355 | 10.48603187 | 15.44710501 |
| C | 18.08717096 | 10.48603187 | 15.44710501 |
| C | 11.00100846 | 12.78845788 | 15.44710501 |
| C | 18.83523287 | 12.78845788 | 15.44710501 |

|   |             |             |             |
|---|-------------|-------------|-------------|
| C | 11.74912355 | 15.09088269 | 15.44710501 |
| C | 18.08717096 | 15.09088269 | 15.44710501 |
| C | 13.70766616 | 16.51385312 | 15.44710501 |
| C | 16.12862756 | 16.51385312 | 15.44710501 |
| C | 14.91814686 | 8.87135141  | 16.108412   |
| C | 12.61569279 | 9.61942937  | 16.108412   |
| C | 17.22057395 | 9.61942937  | 16.108412   |
| C | 11.192751   | 11.57800241 | 16.108412   |
| C | 18.64354272 | 11.57800241 | 16.108412   |
| C | 11.192751   | 13.99891274 | 16.108412   |
| C | 18.64354272 | 13.99891274 | 16.108412   |
| C | 12.61569279 | 15.95748578 | 16.108412   |
| C | 17.22057395 | 15.95748578 | 16.108412   |
| C | 14.91814686 | 16.70556375 | 16.108412   |
| C | 11.36563849 | 8.87131181  | 45.15312334 |
| C | 14.20758153 | 8.87131181  | 45.15312334 |
| C | 9.94464038  | 8.87135141  | 45.15312334 |
| C | 15.62871298 | 8.87135141  | 45.15312334 |
| C | 18.47068142 | 8.87135141  | 45.15312334 |
| C | 19.89165334 | 8.87135141  | 45.15312334 |
| C | 13.48529857 | 8.84412023  | 43.97589169 |
| C | 16.35102213 | 8.84415982  | 43.97589169 |
| C | 12.07077119 | 8.86091879  | 43.96321416 |
| C | 17.76554872 | 8.8609389   | 43.96321416 |
| C | 9.23415481  | 8.87135141  | 43.92251375 |
| C | 20.6021401  | 8.87135141  | 43.92251375 |
| C | 15.61872632 | 8.78626563  | 42.74448399 |
| C | 14.21756819 | 8.78622603  | 42.74446123 |
| C | 11.37157746 | 8.82851091  | 42.73625283 |
| C | 18.46474324 | 8.82853101  | 42.73625283 |
| C | 9.94464038  | 8.87135141  | 42.69192694 |
| C | 19.89165334 | 8.87135141  | 42.69192694 |
| C | 12.10477884 | 8.67377075  | 41.53001788 |
| C | 17.73151488 | 8.67381034  | 41.53001788 |
| C | 13.52034433 | 8.68646366  | 41.50931424 |
| C | 16.31610971 | 8.68646366  | 41.50931424 |
| C | 9.23415481  | 8.87131181  | 41.46131753 |
| C | 20.60211311 | 8.87135141  | 41.46131753 |
| C | 19.86174655 | 8.72593263  | 40.43284172 |
| C | 9.9744936   | 8.72595213  | 40.43279552 |
| C | 11.40619782 | 8.5041152   | 40.33132981 |
| C | 18.43017606 | 8.5041152   | 40.33128429 |
| C | 15.6316154  | 8.60036713  | 40.26363281 |
| C | 14.20481165 | 8.60038663  | 40.26356417 |



|   |             |             |             |
|---|-------------|-------------|-------------|
| C | 12.11125037 | 8.26849363  | 39.11684096 |
| C | 17.72509732 | 8.26851372  | 39.11684096 |
| C | 16.35562934 | 8.46661039  | 39.03639794 |
| C | 13.48069136 | 8.46662991  | 39.03635241 |
| C | 9.24227716  | 8.84501276  | 38.99786373 |
| C | 20.59396378 | 8.84501276  | 38.99777268 |
| C | 11.26862197 | 8.08326954  | 37.88552481 |
| C | 18.56769874 | 8.08326954  | 37.88552481 |
| C | 14.21738168 | 8.36879152  | 37.78850464 |
| C | 15.6189922  | 8.36879152  | 37.78848222 |
| C | 12.5190231  | 16.06117471 | 37.72589257 |
| C | 17.31732459 | 16.06111559 | 37.72586946 |
| C | 11.11775782 | 13.96981728 | 37.72418217 |
| C | 18.7185359  | 13.9698362  | 37.72418217 |
| C | 14.91812067 | 16.91673045 | 37.72251799 |
| C | 10.91562942 | 11.34503835 | 37.67094152 |
| C | 18.92063732 | 11.34507795 | 37.67094152 |
| C | 9.70384394  | 8.127002    | 37.44942631 |
| C | 20.13250296 | 8.127002    | 37.44942631 |
| C | 17.84714676 | 8.97119299  | 36.94943954 |
| C | 11.98912157 | 8.97117289  | 36.94939402 |
| C | 18.92894697 | 12.65456225 | 36.83810095 |
| C | 10.9074539  | 12.65454215 | 36.83807784 |
| C | 18.16788962 | 15.07493647 | 36.80218834 |
| C | 11.66840489 | 15.07491637 | 36.80216592 |
| C | 13.6631663  | 16.62299657 | 36.78634167 |
| C | 16.17307504 | 16.62301667 | 36.78631925 |
| C | 11.42949975 | 10.27252506 | 36.67812687 |
| C | 18.40679476 | 10.27246537 | 36.67808135 |
| C | 13.45352747 | 8.72386975  | 36.62830562 |
| C | 16.38268689 | 8.72386975  | 36.6282832  |
| C | 13.70766616 | 9.06306144  | 35.24371901 |
| C | 16.12862756 | 9.06306144  | 35.24371901 |
| C | 11.74912355 | 10.48603187 | 35.24371901 |
| C | 18.08717096 | 10.48603187 | 35.24371901 |
| C | 11.00100846 | 12.78845788 | 35.24371901 |
| C | 18.83523287 | 12.78845788 | 35.24371901 |
| C | 11.74912355 | 15.09088269 | 35.24371901 |
| C | 18.08717096 | 15.09088269 | 35.24371901 |
| C | 13.70766616 | 16.51385312 | 35.24371901 |
| C | 16.12862756 | 16.51385312 | 35.24371901 |
| C | 14.91814686 | 8.87135141  | 34.58241202 |
| C | 12.61569279 | 9.61942937  | 34.58241202 |
| C | 17.22057395 | 9.61942937  | 34.58241202 |

|   |             |             |             |
|---|-------------|-------------|-------------|
| C | 11.192751   | 11.57800241 | 34.58241202 |
| C | 18.64354272 | 11.57800241 | 34.58241202 |
| C | 11.192751   | 13.99891274 | 34.58241202 |
| C | 18.64354272 | 13.99891274 | 34.58241202 |
| C | 12.61569279 | 15.95748578 | 34.58241202 |
| C | 17.22057395 | 15.95748578 | 34.58241202 |
| C | 14.91814686 | 16.70556375 | 34.58241202 |
| C | 24.86449999 | 8.87134121  | 1.85229742  |
| C | 26.28449997 | 8.87134121  | 1.85229742  |
| C | 24.15449999 | 8.87134121  | 3.0820535   |
| C | 24.86449999 | 8.87134121  | 4.31180958  |
| C | 26.28449997 | 8.87134121  | 4.31180958  |
| C | 24.15449999 | 8.87134121  | 5.54156565  |
| C | 24.86449999 | 8.87134121  | 6.77132172  |
| C | 26.28449997 | 8.87134121  | 6.77132172  |
| C | 24.15449999 | 8.87134121  | 8.00107778  |
| C | 24.86449999 | 8.87134121  | 9.23083384  |
| C | 26.28449997 | 8.87134121  | 9.23083384  |
| C | 24.15449999 | 8.87134121  | 10.46058993 |
| C | 24.86449999 | 8.87134121  | 11.69034601 |
| C | 26.28449997 | 8.87134121  | 11.69034601 |
| C | 24.15449999 | 8.87134121  | 12.92010208 |
| C | 24.86449999 | 8.87134121  | 48.83690676 |
| C | 26.28449997 | 8.87134121  | 48.83690676 |
| C | 24.15449999 | 8.87134121  | 47.60715068 |
| C | 24.86449999 | 8.87134121  | 46.37739458 |
| C | 26.28449997 | 8.87134121  | 46.37739458 |
| C | 24.15449999 | 8.87134121  | 45.14763853 |
| C | 24.86449999 | 8.87134121  | 43.91788244 |
| C | 26.28449997 | 8.87134121  | 43.91788244 |
| C | 24.15449999 | 8.87134121  | 42.68812638 |
| C | 24.86449999 | 8.87134121  | 41.45837031 |
| C | 26.28449997 | 8.87134121  | 41.45837031 |
| C | 24.15449999 | 8.87134121  | 40.22861424 |
| C | 24.86449999 | 8.87134121  | 38.99885816 |
| C | 26.28449997 | 8.87134121  | 38.99885816 |
| C | 24.15449999 | 8.87134121  | 37.7691021  |
| C | 4.97149999  | 8.87134121  | 1.85229742  |
| C | 3.55150001  | 8.87134121  | 1.85229742  |
| C | 5.68149999  | 8.87134121  | 3.0820535   |
| C | 4.97149999  | 8.87134121  | 4.31180958  |
| C | 3.55150001  | 8.87134121  | 4.31180958  |
| C | 5.68149999  | 8.87134121  | 5.54156565  |
| C | 4.97149999  | 8.87134121  | 6.77132172  |

|   |             |            |             |
|---|-------------|------------|-------------|
| C | 3.55150001  | 8.87134121 | 6.77132172  |
| C | 5.68149999  | 8.87134121 | 8.00107778  |
| C | 4.97149999  | 8.87134121 | 9.23083384  |
| C | 3.55150001  | 8.87134121 | 9.23083384  |
| C | 5.68149999  | 8.87134121 | 10.46058993 |
| C | 4.97149999  | 8.87134121 | 11.69034601 |
| C | 3.55150001  | 8.87134121 | 11.69034601 |
| C | 5.68149999  | 8.87134121 | 12.92010208 |
| C | 4.97149999  | 8.87134121 | 48.83690676 |
| C | 3.55150001  | 8.87134121 | 48.83690676 |
| C | 5.68149999  | 8.87134121 | 47.60715068 |
| C | 4.97149999  | 8.87134121 | 46.37739458 |
| C | 3.55150001  | 8.87134121 | 46.37739458 |
| C | 5.68149999  | 8.87134121 | 45.14763853 |
| C | 4.97149999  | 8.87134121 | 43.91788244 |
| C | 3.55150001  | 8.87134121 | 43.91788244 |
| C | 5.68149999  | 8.87134121 | 42.68812638 |
| C | 4.97149999  | 8.87134121 | 41.45837031 |
| C | 3.55150001  | 8.87134121 | 41.45837031 |
| C | 5.68149999  | 8.87134121 | 40.22861424 |
| C | 4.97149999  | 8.87134121 | 38.99885816 |
| C | 3.55150001  | 8.87134121 | 38.99885816 |
| C | 5.68149999  | 8.87134121 | 37.7691021  |
| C | 29.12548068 | 8.87134121 | 1.85278526  |
| C | 26.99458354 | 8.87134121 | 3.0769897   |
| C | 28.41548068 | 8.87134121 | 3.08254134  |
| C | 29.12548068 | 8.87134121 | 4.31229743  |
| C | 26.99458354 | 8.87134121 | 5.53819041  |
| C | 28.41548068 | 8.87134121 | 5.5420535   |
| C | 29.12548068 | 8.87134121 | 6.77180957  |
| C | 26.99458354 | 8.87134121 | 7.99938925  |
| C | 28.41548068 | 8.87134121 | 8.00156562  |
| C | 29.12548068 | 8.87134121 | 9.23132168  |
| C | 26.99449999 | 8.87134121 | 10.46058993 |
| C | 28.41548068 | 8.87134121 | 10.46107778 |
| C | 29.12548068 | 8.87134121 | 11.69083385 |
| C | 26.99449999 | 8.87134121 | 12.92058992 |
| C | 28.41548068 | 8.87134121 | 12.92058992 |
| C | 29.12548068 | 8.87134121 | 48.83739459 |
| C | 26.99458354 | 8.87134121 | 47.61319014 |
| C | 28.41548068 | 8.87134121 | 47.6076385  |
| C | 29.12548068 | 8.87134121 | 46.37788242 |
| C | 26.99458354 | 8.87134121 | 45.15198943 |
| C | 28.41548068 | 8.87134121 | 45.14812635 |

|   |             |            |             |
|---|-------------|------------|-------------|
| C | 29.12548068 | 8.87134121 | 43.91837028 |
| C | 26.99458354 | 8.87134121 | 42.6907906  |
| C | 28.41548068 | 8.87134121 | 42.68861423 |
| C | 29.12548068 | 8.87134121 | 41.45885817 |
| C | 26.99449999 | 8.87134121 | 40.22958992 |
| C | 28.41548068 | 8.87134121 | 40.22910208 |
| C | 29.12548068 | 8.87134121 | 38.999346   |
| C | 26.99449999 | 8.87134121 | 37.76958993 |
| C | 28.41548068 | 8.87134121 | 37.76958993 |
| C | 0.7105193   | 8.87134121 | 1.85278526  |
| C | 2.84141644  | 8.87134121 | 3.0769897   |
| C | 1.42051931  | 8.87134121 | 3.08254134  |
| C | 0.7105193   | 8.87134121 | 4.31229743  |
| C | 2.84141644  | 8.87134121 | 5.53819041  |
| C | 1.42051931  | 8.87134121 | 5.5420535   |
| C | 0.7105193   | 8.87134121 | 6.77180957  |
| C | 2.84141644  | 8.87134121 | 7.99938925  |
| C | 1.42051931  | 8.87134121 | 8.00156562  |
| C | 0.7105193   | 8.87134121 | 9.23132168  |
| C | 2.84149999  | 8.87134121 | 10.46058993 |
| C | 1.42051931  | 8.87134121 | 10.46107778 |
| C | 0.7105193   | 8.87134121 | 11.69083385 |
| C | 2.84149999  | 8.87134121 | 12.92058992 |
| C | 1.42051931  | 8.87134121 | 12.92058992 |
| C | 0.7105193   | 8.87134121 | 48.83739459 |
| C | 2.84141644  | 8.87134121 | 47.61319014 |
| C | 1.42051931  | 8.87134121 | 47.6076385  |
| C | 0.7105193   | 8.87134121 | 46.37788242 |
| C | 2.84141644  | 8.87134121 | 45.15198943 |
| C | 1.42051931  | 8.87134121 | 45.14812635 |
| C | 0.7105193   | 8.87134121 | 43.91837028 |
| C | 2.84141644  | 8.87134121 | 42.6907906  |
| C | 1.42051931  | 8.87134121 | 42.68861423 |
| C | 0.7105193   | 8.87134121 | 41.45885817 |
| C | 2.84149999  | 8.87134121 | 40.22958992 |
| C | 1.42051931  | 8.87134121 | 40.22910208 |
| C | 0.7105193   | 8.87134121 | 38.999346   |
| C | 2.84149999  | 8.87134121 | 37.76958993 |
| C | 1.42051931  | 8.87134121 | 37.76958993 |
| C | 11.36565427 | 8.87130905 | 0.61530072  |
| C | 9.94467955  | 8.87130905 | 0.61530072  |
| C | 18.47067858 | 8.87134121 | 0.61529921  |
| C | 19.89165334 | 8.87134121 | 0.61529921  |
| C | 14.20775886 | 8.87134121 | 0.61529921  |

|   |             |            |             |
|---|-------------|------------|-------------|
| C | 15.62873263 | 8.87134121 | 0.61529921  |
| C | 22.73360285 | 8.87134121 | 0.61530213  |
| C | 7.10270479  | 8.87134121 | 0.61530213  |
| C | 24.15449999 | 8.87134121 | 0.62254134  |
| C | 5.68149999  | 8.87134121 | 0.62254134  |
| C | 26.99458354 | 8.87134121 | 0.61578998  |
| C | 28.41548068 | 8.87134121 | 0.62302918  |
| C | 2.84141644  | 8.87134121 | 0.61578998  |
| C | 1.42051931  | 8.87134121 | 0.62302918  |
| C | 11.36565427 | 8.87130905 | 50.07413147 |
| C | 9.94467955  | 8.87130905 | 50.07413147 |
| C | 18.47067858 | 8.87134121 | 50.07413299 |
| C | 19.89165334 | 8.87134121 | 50.07413299 |
| C | 14.20775886 | 8.87134121 | 50.07413299 |
| C | 15.62873263 | 8.87134121 | 50.07413299 |
| C | 22.73360285 | 8.87134121 | 50.07413007 |
| C | 7.10270479  | 8.87134121 | 50.07413007 |
| C | 24.15449999 | 8.87134121 | 50.06666284 |
| C | 5.68149999  | 8.87134121 | 50.06666284 |
| C | 26.99458354 | 8.87134121 | 50.07438988 |
| C | 28.41548068 | 8.87134121 | 50.06715067 |
| C | 2.84141644  | 8.87134121 | 50.07438988 |
| C | 1.42051931  | 8.87134121 | 50.06715067 |

#### Atomic coordinates of VHS

| AtomType | X          | Y         | Z           |
|----------|------------|-----------|-------------|
| C        | 0.71       | 7.0228785 | 4.30414015  |
| C        | 0.71       | 7.0228785 | 6.76365228  |
| C        | 0.71       | 7.0228785 | 9.22316443  |
| C        | 0.71       | 7.0228785 | 11.68267658 |
| C        | 0.71       | 7.0228785 | 43.90991951 |
| C        | 0.71       | 7.0228785 | 14.14218871 |
| C        | 0.71       | 7.0228785 | 46.36943163 |
| C        | 0.71       | 7.0228785 | 16.60170088 |
| C        | 0.71       | 7.0228785 | 48.82894381 |
| C        | 0.71       | 7.0228785 | 51.28845595 |
| C        | 0.71       | 7.0228785 | 53.7479681  |
| C        | 0.71       | 7.0228785 | 56.20748023 |
| C        | 1.41999999 | 7.0228785 | 3.07438407  |
| C        | 1.41999999 | 7.0228785 | 5.53389619  |
| C        | 1.41999999 | 7.0228785 | 7.99340836  |
| C        | 1.41999999 | 7.0228785 | 10.45292049 |
| C        | 1.41999999 | 7.0228785 | 42.68016344 |

|   |            |           |             |
|---|------------|-----------|-------------|
| C | 1.41999999 | 7.0228785 | 12.91243264 |
| C | 1.41999999 | 7.0228785 | 45.13967557 |
| C | 1.41999999 | 7.0228785 | 15.37194479 |
| C | 1.41999999 | 7.0228785 | 47.5991877  |
| C | 1.41999999 | 7.0228785 | 17.83145694 |
| C | 1.41999999 | 7.0228785 | 50.05869989 |
| C | 1.41999999 | 7.0228785 | 52.51821202 |
| C | 1.41999999 | 7.0228785 | 54.97772416 |
| C | 2.83999998 | 7.0228785 | 3.07438407  |
| C | 2.83999998 | 7.0228785 | 5.53389619  |
| C | 2.83999998 | 7.0228785 | 7.99340836  |
| C | 2.83999998 | 7.0228785 | 10.45292049 |
| C | 2.83999998 | 7.0228785 | 42.68016344 |
| C | 2.83999998 | 7.0228785 | 12.91243264 |
| C | 2.83999998 | 7.0228785 | 45.13967557 |
| C | 2.83999998 | 7.0228785 | 15.37194479 |
| C | 2.83999998 | 7.0228785 | 47.5991877  |
| C | 2.83999998 | 7.0228785 | 17.83145694 |
| C | 2.83999998 | 7.0228785 | 50.05869989 |
| C | 2.83999998 | 7.0228785 | 52.51821202 |
| C | 2.83999998 | 7.0228785 | 54.97772416 |
| C | 3.54999997 | 7.0228785 | 4.30414015  |
| C | 3.54999997 | 7.0228785 | 6.76365228  |
| C | 3.54999997 | 7.0228785 | 9.22316443  |
| C | 3.54999997 | 7.0228785 | 11.68267658 |
| C | 3.54999997 | 7.0228785 | 43.90991951 |
| C | 3.54999997 | 7.0228785 | 14.14218871 |
| C | 3.54999997 | 7.0228785 | 46.36943163 |
| C | 3.54999997 | 7.0228785 | 16.60170088 |
| C | 3.54999997 | 7.0228785 | 48.82894381 |
| C | 3.54999997 | 7.0228785 | 51.28845595 |
| C | 3.54999997 | 7.0228785 | 53.7479681  |
| C | 3.54999997 | 7.0228785 | 56.20748023 |
| C | 4.96999997 | 7.0228785 | 4.30414015  |
| C | 4.96999997 | 7.0228785 | 6.76365228  |
| C | 4.96999997 | 7.0228785 | 9.22316443  |
| C | 4.96999997 | 7.0228785 | 11.68267658 |
| C | 4.96999997 | 7.0228785 | 43.90991951 |
| C | 4.96999997 | 7.0228785 | 14.14218871 |
| C | 4.96999997 | 7.0228785 | 46.36943163 |
| C | 4.96999997 | 7.0228785 | 16.60170088 |
| C | 4.96999997 | 7.0228785 | 48.82894381 |
| C | 4.96999997 | 7.0228785 | 51.28845595 |
| C | 4.96999997 | 7.0228785 | 53.7479681  |

|   |            |           |             |
|---|------------|-----------|-------------|
| C | 4.96999997 | 7.0228785 | 56.20748023 |
| C | 5.67999996 | 7.0228785 | 3.07438407  |
| C | 5.67999996 | 7.0228785 | 5.53389619  |
| C | 5.67999996 | 7.0228785 | 7.99340836  |
| C | 5.67999996 | 7.0228785 | 10.45292049 |
| C | 5.67999996 | 7.0228785 | 42.68016344 |
| C | 5.67999996 | 7.0228785 | 12.91243264 |
| C | 5.67999996 | 7.0228785 | 45.13967557 |
| C | 5.67999996 | 7.0228785 | 15.37194479 |
| C | 5.67999996 | 7.0228785 | 47.5991877  |
| C | 5.67999996 | 7.0228785 | 17.83145694 |
| C | 5.67999996 | 7.0228785 | 50.05869989 |
| C | 5.67999996 | 7.0228785 | 52.51821202 |
| C | 5.67999996 | 7.0228785 | 54.97772416 |
| C | 7.09999994 | 7.0228785 | 3.07438407  |
| C | 7.09999994 | 7.0228785 | 5.53389619  |
| C | 7.09999994 | 7.0228785 | 7.99340836  |
| C | 7.09999994 | 7.0228785 | 10.45292049 |
| C | 7.09999994 | 7.0228785 | 42.68016344 |
| C | 7.09999994 | 7.0228785 | 12.91243264 |
| C | 7.09999994 | 7.0228785 | 45.13967557 |
| C | 7.09999994 | 7.0228785 | 15.37194479 |
| C | 7.09999994 | 7.0228785 | 47.5991877  |
| C | 7.09999994 | 7.0228785 | 17.83145694 |
| C | 7.09999994 | 7.0228785 | 50.05869989 |
| C | 7.09999994 | 7.0228785 | 52.51821202 |
| C | 7.09999994 | 7.0228785 | 54.97772416 |
| C | 7.80999994 | 7.0228785 | 4.30414015  |
| C | 7.80999994 | 7.0228785 | 6.76365228  |
| C | 7.80999994 | 7.0228785 | 9.22316443  |
| C | 7.80999994 | 7.0228785 | 11.68267658 |
| C | 7.80999994 | 7.0228785 | 43.90991951 |
| C | 7.80999994 | 7.0228785 | 14.14218871 |
| C | 7.80999994 | 7.0228785 | 46.36943163 |
| C | 7.80999994 | 7.0228785 | 16.60170088 |
| C | 7.80999994 | 7.0228785 | 48.82894381 |
| C | 7.80999994 | 7.0228785 | 51.28845595 |
| C | 7.80999994 | 7.0228785 | 53.7479681  |
| C | 7.80999994 | 7.0228785 | 56.20748023 |
| C | 9.23       | 7.0228785 | 4.30414015  |
| C | 9.23       | 7.0228785 | 6.76365228  |
| C | 9.23       | 7.0228785 | 9.22316443  |
| C | 9.23       | 7.0228785 | 11.68267658 |
| C | 9.23       | 7.0228785 | 43.90991951 |

|   |             |           |             |
|---|-------------|-----------|-------------|
| C | 9.23        | 7.0228785 | 14.14218871 |
| C | 9.23        | 7.0228785 | 46.36943163 |
| C | 9.23        | 7.0228785 | 16.60170088 |
| C | 9.23        | 7.0228785 | 48.82894381 |
| C | 9.23        | 7.0228785 | 51.28845595 |
| C | 9.23        | 7.0228785 | 53.7479681  |
| C | 9.23        | 7.0228785 | 56.20748023 |
| C | 9.93999999  | 7.0228785 | 3.07438407  |
| C | 9.93999999  | 7.0228785 | 5.53389619  |
| C | 9.93999999  | 7.0228785 | 7.99340836  |
| C | 9.93999999  | 7.0228785 | 10.45292049 |
| C | 9.93999999  | 7.0228785 | 42.68016344 |
| C | 9.93999999  | 7.0228785 | 12.91243264 |
| C | 9.93999999  | 7.0228785 | 45.13967557 |
| C | 9.93999999  | 7.0228785 | 15.37194479 |
| C | 9.93999999  | 7.0228785 | 47.5991877  |
| C | 9.93999999  | 7.0228785 | 17.83145694 |
| C | 9.93999999  | 7.0228785 | 50.05869989 |
| C | 9.93999999  | 7.0228785 | 52.51821202 |
| C | 9.93999999  | 7.0228785 | 54.97772416 |
| C | 11.35999999 | 7.0228785 | 3.07438407  |
| C | 11.35999999 | 7.0228785 | 5.53389619  |
| C | 11.35999999 | 7.0228785 | 7.99340836  |
| C | 11.35999999 | 7.0228785 | 10.45292049 |
| C | 11.35999999 | 7.0228785 | 42.68016344 |
| C | 11.35999999 | 7.0228785 | 12.91243264 |
| C | 11.35999999 | 7.0228785 | 45.13967557 |
| C | 11.35999999 | 7.0228785 | 15.37194479 |
| C | 11.35999999 | 7.0228785 | 47.5991877  |
| C | 11.35999999 | 7.0228785 | 17.83145694 |
| C | 11.35999999 | 7.0228785 | 50.05869989 |
| C | 11.35999999 | 7.0228785 | 52.51821202 |
| C | 11.35999999 | 7.0228785 | 54.97772416 |
| C | 12.07       | 7.0228785 | 4.30414015  |
| C | 12.07       | 7.0228785 | 6.76365228  |
| C | 12.07       | 7.0228785 | 9.22316443  |
| C | 12.07       | 7.0228785 | 11.68267658 |
| C | 12.07       | 7.0228785 | 43.90991951 |
| C | 12.07       | 7.0228785 | 14.14218871 |
| C | 12.07       | 7.0228785 | 46.36943163 |
| C | 12.07       | 7.0228785 | 16.60170088 |
| C | 12.07       | 7.0228785 | 48.82894381 |
| C | 12.07       | 7.0228785 | 51.28845595 |
| C | 12.07       | 7.0228785 | 53.7479681  |



|   |             |           |             |
|---|-------------|-----------|-------------|
| C | 12.07       | 7.0228785 | 56.20748023 |
| C | 13.49       | 7.0228785 | 4.30414015  |
| C | 13.49       | 7.0228785 | 6.76365228  |
| C | 13.49       | 7.0228785 | 9.22316443  |
| C | 13.49       | 7.0228785 | 11.68267658 |
| C | 13.49       | 7.0228785 | 43.90991951 |
| C | 13.49       | 7.0228785 | 14.14218871 |
| C | 13.49       | 7.0228785 | 46.36943163 |
| C | 13.49       | 7.0228785 | 16.60170088 |
| C | 13.49       | 7.0228785 | 48.82894381 |
| C | 13.49       | 7.0228785 | 51.28845595 |
| C | 13.49       | 7.0228785 | 53.7479681  |
| C | 13.49       | 7.0228785 | 56.20748023 |
| C | 14.19999999 | 7.0228785 | 3.07438407  |
| C | 14.19999999 | 7.0228785 | 5.53389619  |
| C | 14.19999999 | 7.0228785 | 7.99340836  |
| C | 14.19999999 | 7.0228785 | 10.45292049 |
| C | 14.19999999 | 7.0228785 | 42.68016344 |
| C | 14.19999999 | 7.0228785 | 12.91243264 |
| C | 14.19999999 | 7.0228785 | 45.13967557 |
| C | 14.19999999 | 7.0228785 | 15.37194479 |
| C | 14.19999999 | 7.0228785 | 47.5991877  |
| C | 14.19999999 | 7.0228785 | 17.83145694 |
| C | 14.19999999 | 7.0228785 | 50.05869989 |
| C | 14.19999999 | 7.0228785 | 52.51821202 |
| C | 14.19999999 | 7.0228785 | 54.97772416 |
| C | 15.61999999 | 7.0228785 | 3.07438407  |
| C | 15.61999999 | 7.0228785 | 5.53389619  |
| C | 15.61999999 | 7.0228785 | 7.99340836  |
| C | 15.61999999 | 7.0228785 | 10.45292049 |
| C | 15.61999999 | 7.0228785 | 42.68016344 |
| C | 15.61999999 | 7.0228785 | 12.91243264 |
| C | 15.61999999 | 7.0228785 | 45.13967557 |
| C | 15.61999999 | 7.0228785 | 15.37194479 |
| C | 15.61999999 | 7.0228785 | 47.5991877  |
| C | 15.61999999 | 7.0228785 | 17.83145694 |
| C | 15.61999999 | 7.0228785 | 50.05869989 |
| C | 15.61999999 | 7.0228785 | 52.51821202 |
| C | 15.61999999 | 7.0228785 | 54.97772416 |
| C | 16.32999999 | 7.0228785 | 4.30414015  |
| C | 16.32999999 | 7.0228785 | 6.76365228  |
| C | 16.32999999 | 7.0228785 | 9.22316443  |
| C | 16.32999999 | 7.0228785 | 11.68267658 |
| C | 16.32999999 | 7.0228785 | 43.90991951 |

|   |             |           |             |
|---|-------------|-----------|-------------|
| C | 16.32999999 | 7.0228785 | 14.14218871 |
| C | 16.32999999 | 7.0228785 | 46.36943163 |
| C | 16.32999999 | 7.0228785 | 16.60170088 |
| C | 16.32999999 | 7.0228785 | 48.82894381 |
| C | 16.32999999 | 7.0228785 | 51.28845595 |
| C | 16.32999999 | 7.0228785 | 53.7479681  |
| C | 16.32999999 | 7.0228785 | 56.20748023 |
| C | 17.75000001 | 7.0228785 | 4.30414015  |
| C | 17.75000001 | 7.0228785 | 6.76365228  |
| C | 17.75000001 | 7.0228785 | 9.22316443  |
| C | 17.75000001 | 7.0228785 | 11.68267658 |
| C | 17.75000001 | 7.0228785 | 43.90991951 |
| C | 17.75000001 | 7.0228785 | 14.14218871 |
| C | 17.75000001 | 7.0228785 | 46.36943163 |
| C | 17.75000001 | 7.0228785 | 16.60170088 |
| C | 17.75000001 | 7.0228785 | 48.82894381 |
| C | 17.75000001 | 7.0228785 | 51.28845595 |
| C | 17.75000001 | 7.0228785 | 53.7479681  |
| C | 17.75000001 | 7.0228785 | 56.20748023 |
| C | 18.46000001 | 7.0228785 | 3.07438407  |
| C | 18.46000001 | 7.0228785 | 5.53389619  |
| C | 18.46000001 | 7.0228785 | 7.99340836  |
| C | 18.46000001 | 7.0228785 | 10.45292049 |
| C | 18.46000001 | 7.0228785 | 42.68016344 |
| C | 18.46000001 | 7.0228785 | 12.91243264 |
| C | 18.46000001 | 7.0228785 | 45.13967557 |
| C | 18.46000001 | 7.0228785 | 15.37194479 |
| C | 18.46000001 | 7.0228785 | 47.5991877  |
| C | 18.46000001 | 7.0228785 | 17.83145694 |
| C | 18.46000001 | 7.0228785 | 50.05869989 |
| C | 18.46000001 | 7.0228785 | 52.51821202 |
| C | 18.46000001 | 7.0228785 | 54.97772416 |
| C | 19.87999999 | 7.0228785 | 3.07438407  |
| C | 19.87999999 | 7.0228785 | 5.53389619  |
| C | 19.87999999 | 7.0228785 | 7.99340836  |
| C | 19.87999999 | 7.0228785 | 10.45292049 |
| C | 19.87999999 | 7.0228785 | 42.68016344 |
| C | 19.87999999 | 7.0228785 | 12.91243264 |
| C | 19.87999999 | 7.0228785 | 45.13967557 |
| C | 19.87999999 | 7.0228785 | 15.37194479 |
| C | 19.87999999 | 7.0228785 | 47.5991877  |
| C | 19.87999999 | 7.0228785 | 17.83145694 |
| C | 19.87999999 | 7.0228785 | 50.05869989 |
| C | 19.87999999 | 7.0228785 | 52.51821202 |

|   |             |           |             |
|---|-------------|-----------|-------------|
| C | 19.87999999 | 7.0228785 | 54.97772416 |
| C | 20.58999998 | 7.0228785 | 4.30414015  |
| C | 20.58999998 | 7.0228785 | 6.76365228  |
| C | 20.58999998 | 7.0228785 | 9.22316443  |
| C | 20.58999998 | 7.0228785 | 11.68267658 |
| C | 20.58999998 | 7.0228785 | 43.90991951 |
| C | 20.58999998 | 7.0228785 | 14.14218871 |
| C | 20.58999998 | 7.0228785 | 46.36943163 |
| C | 20.58999998 | 7.0228785 | 16.60170088 |
| C | 20.58999998 | 7.0228785 | 48.82894381 |
| C | 20.58999998 | 7.0228785 | 51.28845595 |
| C | 20.58999998 | 7.0228785 | 53.7479681  |
| C | 20.58999998 | 7.0228785 | 56.20748023 |
| C | 22.01       | 7.0228785 | 4.30414015  |
| C | 22.01       | 7.0228785 | 6.76365228  |
| C | 22.01       | 7.0228785 | 9.22316443  |
| C | 22.01       | 7.0228785 | 11.68267658 |
| C | 22.01       | 7.0228785 | 43.90991951 |
| C | 22.01       | 7.0228785 | 14.14218871 |
| C | 22.01       | 7.0228785 | 46.36943163 |
| C | 22.01       | 7.0228785 | 16.60170088 |
| C | 22.01       | 7.0228785 | 48.82894381 |
| C | 22.01       | 7.0228785 | 51.28845595 |
| C | 22.01       | 7.0228785 | 53.7479681  |
| C | 22.01       | 7.0228785 | 56.20748023 |
| C | 22.71999999 | 7.0228785 | 3.07438407  |
| C | 22.71999999 | 7.0228785 | 5.53389619  |
| C | 22.71999999 | 7.0228785 | 7.99340836  |
| C | 22.71999999 | 7.0228785 | 10.45292049 |
| C | 22.71999999 | 7.0228785 | 42.68016344 |
| C | 22.71999999 | 7.0228785 | 12.91243264 |
| C | 22.71999999 | 7.0228785 | 45.13967557 |
| C | 22.71999999 | 7.0228785 | 15.37194479 |
| C | 22.71999999 | 7.0228785 | 47.5991877  |
| C | 22.71999999 | 7.0228785 | 17.83145694 |
| C | 22.71999999 | 7.0228785 | 50.05869989 |
| C | 22.71999999 | 7.0228785 | 52.51821202 |
| C | 22.71999999 | 7.0228785 | 54.97772416 |
| C | 24.14       | 7.0228785 | 3.07438407  |
| C | 24.14       | 7.0228785 | 5.53389619  |
| C | 24.14       | 7.0228785 | 7.99340836  |
| C | 24.14       | 7.0228785 | 10.45292049 |
| C | 24.14       | 7.0228785 | 42.68016344 |
| C | 24.14       | 7.0228785 | 12.91243264 |

|   |             |           |             |
|---|-------------|-----------|-------------|
| C | 24.14       | 7.0228785 | 45.13967557 |
| C | 24.14       | 7.0228785 | 15.37194479 |
| C | 24.14       | 7.0228785 | 47.5991877  |
| C | 24.14       | 7.0228785 | 17.83145694 |
| C | 24.14       | 7.0228785 | 50.05869989 |
| C | 24.14       | 7.0228785 | 52.51821202 |
| C | 24.14       | 7.0228785 | 54.97772416 |
| C | 24.85       | 7.0228785 | 4.30414015  |
| C | 24.85       | 7.0228785 | 6.76365228  |
| C | 24.85       | 7.0228785 | 9.22316443  |
| C | 24.85       | 7.0228785 | 11.68267658 |
| C | 24.85       | 7.0228785 | 43.90991951 |
| C | 24.85       | 7.0228785 | 14.14218871 |
| C | 24.85       | 7.0228785 | 46.36943163 |
| C | 24.85       | 7.0228785 | 16.60170088 |
| C | 24.85       | 7.0228785 | 48.82894381 |
| C | 24.85       | 7.0228785 | 51.28845595 |
| C | 24.85       | 7.0228785 | 53.7479681  |
| C | 24.85       | 7.0228785 | 56.20748023 |
| C | 26.26999998 | 7.0228785 | 4.30414015  |
| C | 26.26999998 | 7.0228785 | 6.76365228  |
| C | 26.26999998 | 7.0228785 | 9.22316443  |
| C | 26.26999998 | 7.0228785 | 11.68267658 |
| C | 26.26999998 | 7.0228785 | 43.90991951 |
| C | 26.26999998 | 7.0228785 | 14.14218871 |
| C | 26.26999998 | 7.0228785 | 46.36943163 |
| C | 26.26999998 | 7.0228785 | 16.60170088 |
| C | 26.26999998 | 7.0228785 | 48.82894381 |
| C | 26.26999998 | 7.0228785 | 51.28845595 |
| C | 26.26999998 | 7.0228785 | 53.7479681  |
| C | 26.26999998 | 7.0228785 | 56.20748023 |
| C | 26.98       | 7.0228785 | 3.07438407  |
| C | 26.98       | 7.0228785 | 5.53389619  |
| C | 26.98       | 7.0228785 | 7.99340836  |
| C | 26.98       | 7.0228785 | 10.45292049 |
| C | 26.98       | 7.0228785 | 42.68016344 |
| C | 26.98       | 7.0228785 | 12.91243264 |
| C | 26.98       | 7.0228785 | 45.13967557 |
| C | 26.98       | 7.0228785 | 15.37194479 |
| C | 26.98       | 7.0228785 | 47.5991877  |
| C | 26.98       | 7.0228785 | 17.83145694 |
| C | 26.98       | 7.0228785 | 50.05869989 |
| C | 26.98       | 7.0228785 | 52.51821202 |
| C | 26.98       | 7.0228785 | 54.97772416 |

|   |             |             |             |
|---|-------------|-------------|-------------|
| C | 28.39999999 | 7.0228785   | 3.07438407  |
| C | 28.39999999 | 7.0228785   | 5.53389619  |
| C | 28.39999999 | 7.0228785   | 7.99340836  |
| C | 28.39999999 | 7.0228785   | 10.45292049 |
| C | 28.39999999 | 7.0228785   | 42.68016344 |
| C | 28.39999999 | 7.0228785   | 12.91243264 |
| C | 28.39999999 | 7.0228785   | 45.13967557 |
| C | 28.39999999 | 7.0228785   | 15.37194479 |
| C | 28.39999999 | 7.0228785   | 47.5991877  |
| C | 28.39999999 | 7.0228785   | 17.83145694 |
| C | 28.39999999 | 7.0228785   | 50.05869989 |
| C | 28.39999999 | 7.0228785   | 52.51821202 |
| C | 28.39999999 | 7.0228785   | 54.97772416 |
| C | 29.10999998 | 7.0228785   | 4.30414015  |
| C | 29.10999998 | 7.0228785   | 6.76365228  |
| C | 29.10999998 | 7.0228785   | 9.22316443  |
| C | 29.10999998 | 7.0228785   | 11.68267658 |
| C | 29.10999998 | 7.0228785   | 43.90991951 |
| C | 29.10999998 | 7.0228785   | 14.14218871 |
| C | 29.10999998 | 7.0228785   | 46.36943163 |
| C | 29.10999998 | 7.0228785   | 16.60170088 |
| C | 29.10999998 | 7.0228785   | 48.82894381 |
| C | 29.10999998 | 7.0228785   | 51.28845595 |
| C | 29.10999998 | 7.0228785   | 53.7479681  |
| C | 29.10999998 | 7.0228785   | 56.20748023 |
| C | 14.90999998 | 10.14287855 | 13.91468019 |
| C | 12.60757373 | 10.89098216 | 13.91468019 |
| C | 17.21242622 | 10.89098216 | 13.91468019 |
| C | 11.18459608 | 12.84954283 | 13.91468019 |
| C | 18.63540387 | 12.84954283 | 13.91468019 |
| C | 11.18459608 | 15.27045709 | 13.91468019 |
| C | 18.63540387 | 15.27045709 | 13.91468019 |
| C | 12.60757373 | 17.2290178  | 13.91468019 |
| C | 17.21242622 | 17.2290178  | 13.91468019 |
| C | 14.90999998 | 17.97712144 | 13.91468019 |
| C | 13.69954292 | 10.33459608 | 14.62516744 |
| C | 16.12045712 | 10.33459608 | 14.62516744 |
| C | 11.74098219 | 11.75757373 | 14.62516744 |
| C | 18.07901783 | 11.75757373 | 14.62516744 |
| C | 10.99287855 | 14.05999996 | 14.62516744 |
| C | 18.82712146 | 14.06       | 14.62516744 |
| C | 11.74098215 | 16.3624262  | 14.62516744 |
| C | 18.07901782 | 16.36242623 | 14.62516744 |
| C | 13.69954283 | 17.78540388 | 14.62516744 |

|   |             |             |             |
|---|-------------|-------------|-------------|
| C | 16.12045708 | 17.78540388 | 14.62516744 |
| C | 13.69954292 | 10.33459608 | 16.04614188 |
| C | 16.12045712 | 10.33459608 | 16.04614188 |
| C | 11.74098215 | 16.3624262  | 16.04614188 |
| C | 18.07901782 | 16.36242623 | 16.04614188 |
| C | 13.69954283 | 17.78540388 | 16.04614188 |
| C | 16.12045708 | 17.78540388 | 16.04614188 |
| C | 11.74098219 | 11.75757373 | 16.04614192 |
| C | 18.07901783 | 11.75757373 | 16.04614192 |
| C | 10.99287855 | 14.05999996 | 16.04614192 |
| C | 18.82712146 | 14.06       | 16.04614192 |
| C | 14.90999998 | 10.14287855 | 16.75662914 |
| C | 12.60757373 | 10.89098216 | 16.75662914 |
| C | 17.21242622 | 10.89098216 | 16.75662914 |
| C | 11.18459608 | 12.84954283 | 16.75662914 |
| C | 18.63540387 | 12.84954283 | 16.75662914 |
| C | 11.18459608 | 15.27045709 | 16.75662914 |
| C | 18.63540387 | 15.27045709 | 16.75662914 |
| C | 12.60757373 | 17.2290178  | 16.75662914 |
| C | 17.21242622 | 17.2290178  | 16.75662914 |
| C | 14.90999998 | 17.97712144 | 16.75662914 |
| C | 14.90999998 | 10.14287855 | 18.17760364 |
| C | 12.60757373 | 10.89098216 | 18.17760364 |
| C | 17.21242622 | 10.89098216 | 18.17760364 |
| C | 11.18459608 | 12.84954283 | 18.17760364 |
| C | 18.63540387 | 12.84954283 | 18.17760364 |
| C | 11.18459608 | 15.27045709 | 18.17760364 |
| C | 18.63540387 | 15.27045709 | 18.17760364 |
| C | 12.60757373 | 17.2290178  | 18.17760364 |
| C | 17.21242622 | 17.2290178  | 18.17760364 |
| C | 14.90999998 | 17.97712144 | 18.17760364 |
| C | 13.69954292 | 10.33459608 | 18.88809089 |
| C | 16.12045712 | 10.33459608 | 18.88809089 |
| C | 11.74098219 | 11.75757373 | 18.88809089 |
| C | 18.07901783 | 11.75757373 | 18.88809089 |
| C | 10.99287855 | 14.05999996 | 18.88809089 |
| C | 18.82712146 | 14.06       | 18.88809089 |
| C | 11.74098215 | 16.3624262  | 18.88809089 |
| C | 18.07901782 | 16.36242623 | 18.88809089 |
| C | 13.69954283 | 17.78540388 | 18.88809089 |
| C | 16.12045708 | 17.78540388 | 18.88809089 |
| C | 13.69954292 | 10.33459608 | 20.30906534 |
| C | 16.12045712 | 10.33459608 | 20.30906534 |
| C | 11.74098215 | 16.3624262  | 20.30906534 |

|   |             |             |             |
|---|-------------|-------------|-------------|
| C | 18.07901782 | 16.36242623 | 20.30906534 |
| C | 13.69954283 | 17.78540388 | 20.30906534 |
| C | 16.12045708 | 17.78540388 | 20.30906534 |
| C | 11.74098219 | 11.75757373 | 20.30906536 |
| C | 18.07901783 | 11.75757373 | 20.30906536 |
| C | 10.99287855 | 14.05999996 | 20.30906536 |
| C | 18.82712146 | 14.06       | 20.30906536 |
| C | 14.90999998 | 10.14287855 | 21.01955256 |
| C | 12.60757373 | 10.89098216 | 21.01955256 |
| C | 17.21242622 | 10.89098216 | 21.01955256 |
| C | 11.18459608 | 12.84954283 | 21.01955256 |
| C | 18.63540387 | 12.84954283 | 21.01955256 |
| C | 11.18459608 | 15.27045709 | 21.01955256 |
| C | 18.63540387 | 15.27045709 | 21.01955256 |
| C | 12.60757373 | 17.2290178  | 21.01955256 |
| C | 17.21242622 | 17.2290178  | 21.01955256 |
| C | 14.90999998 | 17.97712144 | 21.01955256 |
| C | 14.90999998 | 10.14287855 | 22.44052707 |
| C | 12.60757373 | 10.89098216 | 22.44052707 |
| C | 17.21242622 | 10.89098216 | 22.44052707 |
| C | 11.18459608 | 12.84954283 | 22.44052707 |
| C | 18.63540387 | 12.84954283 | 22.44052707 |
| C | 11.18459608 | 15.27045709 | 22.44052707 |
| C | 18.63540387 | 15.27045709 | 22.44052707 |
| C | 12.60757373 | 17.2290178  | 22.44052707 |
| C | 17.21242622 | 17.2290178  | 22.44052707 |
| C | 14.90999998 | 17.97712144 | 22.44052707 |
| C | 13.69954292 | 10.33459608 | 23.15101432 |
| C | 16.12045712 | 10.33459608 | 23.15101432 |
| C | 11.74098219 | 11.75757373 | 23.15101432 |
| C | 18.07901783 | 11.75757373 | 23.15101432 |
| C | 10.99287855 | 14.05999996 | 23.15101432 |
| C | 18.82712146 | 14.06       | 23.15101432 |
| C | 11.74098215 | 16.3624262  | 23.15101432 |
| C | 18.07901782 | 16.36242623 | 23.15101432 |
| C | 13.69954283 | 17.78540388 | 23.15101432 |
| C | 16.12045708 | 17.78540388 | 23.15101432 |
| C | 13.69954292 | 10.33459608 | 24.57198878 |
| C | 16.12045712 | 10.33459608 | 24.57198878 |
| C | 11.74098215 | 16.3624262  | 24.57198878 |
| C | 18.07901782 | 16.36242623 | 24.57198878 |
| C | 13.69954283 | 17.78540388 | 24.57198878 |
| C | 16.12045708 | 17.78540388 | 24.57198878 |
| C | 11.74098219 | 11.75757373 | 24.57198881 |

|   |             |             |             |
|---|-------------|-------------|-------------|
| C | 18.07901783 | 11.75757373 | 24.57198881 |
| C | 10.99287855 | 14.05999996 | 24.57198881 |
| C | 18.82712146 | 14.06       | 24.57198881 |
| C | 14.90999998 | 10.14287855 | 25.28247603 |
| C | 12.60757373 | 10.89098216 | 25.28247603 |
| C | 17.21242622 | 10.89098216 | 25.28247603 |
| C | 11.18459608 | 12.84954283 | 25.28247603 |
| C | 18.63540387 | 12.84954283 | 25.28247603 |
| C | 11.18459608 | 15.27045709 | 25.28247603 |
| C | 18.63540387 | 15.27045709 | 25.28247603 |
| C | 12.60757373 | 17.2290178  | 25.28247603 |
| C | 17.21242622 | 17.2290178  | 25.28247603 |
| C | 14.90999998 | 17.97712144 | 25.28247603 |
| C | 14.90999998 | 10.14287855 | 26.70345053 |
| C | 12.60757373 | 10.89098216 | 26.70345053 |
| C | 17.21242622 | 10.89098216 | 26.70345053 |
| C | 11.18459608 | 12.84954283 | 26.70345053 |
| C | 18.63540387 | 12.84954283 | 26.70345053 |
| C | 11.18459608 | 15.27045709 | 26.70345053 |
| C | 18.63540387 | 15.27045709 | 26.70345053 |
| C | 12.60757373 | 17.2290178  | 26.70345053 |
| C | 17.21242622 | 17.2290178  | 26.70345053 |
| C | 14.90999998 | 17.97712144 | 26.70345053 |
| C | 13.69954292 | 10.33459608 | 27.41393778 |
| C | 16.12045712 | 10.33459608 | 27.41393778 |
| C | 11.74098219 | 11.75757373 | 27.41393778 |
| C | 18.07901783 | 11.75757373 | 27.41393778 |
| C | 10.99287855 | 14.05999996 | 27.41393778 |
| C | 18.82712146 | 14.06       | 27.41393778 |
| C | 11.74098215 | 16.3624262  | 27.41393778 |
| C | 18.07901782 | 16.36242623 | 27.41393778 |
| C | 13.69954283 | 17.78540388 | 27.41393778 |
| C | 16.12045708 | 17.78540388 | 27.41393778 |
| C | 13.69954292 | 10.33459608 | 28.83491224 |
| C | 16.12045712 | 10.33459608 | 28.83491224 |
| C | 11.74098215 | 16.3624262  | 28.83491224 |
| C | 18.07901782 | 16.36242623 | 28.83491224 |
| C | 13.69954283 | 17.78540388 | 28.83491224 |
| C | 16.12045708 | 17.78540388 | 28.83491224 |
| C | 11.74098219 | 11.75757373 | 28.83491224 |
| C | 18.07901783 | 11.75757373 | 28.83491224 |
| C | 10.99287855 | 14.05999996 | 28.83491224 |
| C | 18.82712146 | 14.06       | 28.83491224 |
| C | 14.90999998 | 10.14287855 | 29.54539949 |



|   |             |             |             |
|---|-------------|-------------|-------------|
| C | 12.60757373 | 10.89098216 | 29.54539949 |
| C | 17.21242622 | 10.89098216 | 29.54539949 |
| C | 11.18459608 | 12.84954283 | 29.54539949 |
| C | 18.63540387 | 12.84954283 | 29.54539949 |
| C | 11.18459608 | 15.27045709 | 29.54539949 |
| C | 18.63540387 | 15.27045709 | 29.54539949 |
| C | 12.60757373 | 17.2290178  | 29.54539949 |
| C | 17.21242622 | 17.2290178  | 29.54539949 |
| C | 14.90999998 | 17.97712144 | 29.54539949 |
| C | 14.90999998 | 10.14287855 | 30.9662209  |
| C | 12.60757373 | 10.89098216 | 30.9662209  |
| C | 17.21242622 | 10.89098216 | 30.9662209  |
| C | 11.18459608 | 12.84954283 | 30.9662209  |
| C | 18.63540387 | 12.84954283 | 30.9662209  |
| C | 11.18459608 | 15.27045709 | 30.9662209  |
| C | 18.63540387 | 15.27045709 | 30.9662209  |
| C | 12.60757373 | 17.2290178  | 30.9662209  |
| C | 17.21242622 | 17.2290178  | 30.9662209  |
| C | 14.90999998 | 17.97712144 | 30.9662209  |
| C | 13.69954292 | 10.33459608 | 31.67670815 |
| C | 16.12045712 | 10.33459608 | 31.67670815 |
| C | 11.74098219 | 11.75757373 | 31.67670815 |
| C | 18.07901783 | 11.75757373 | 31.67670815 |
| C | 10.99287855 | 14.05999996 | 31.67670815 |
| C | 18.82712146 | 14.06       | 31.67670815 |
| C | 11.74098215 | 16.3624262  | 31.67670815 |
| C | 18.07901782 | 16.36242623 | 31.67670815 |
| C | 13.69954283 | 17.78540388 | 31.67670815 |
| C | 16.12045708 | 17.78540388 | 31.67670815 |
| C | 13.69954292 | 10.33459608 | 33.09768257 |
| C | 16.12045712 | 10.33459608 | 33.09768257 |
| C | 11.74098215 | 16.3624262  | 33.09768257 |
| C | 18.07901782 | 16.36242623 | 33.09768257 |
| C | 13.69954283 | 17.78540388 | 33.09768257 |
| C | 16.12045708 | 17.78540388 | 33.09768257 |
| C | 11.74098219 | 11.75757373 | 33.09768257 |
| C | 18.07901783 | 11.75757373 | 33.09768257 |
| C | 10.99287855 | 14.05999996 | 33.09768257 |
| C | 18.82712146 | 14.06       | 33.09768257 |
| C | 14.90999998 | 10.14287855 | 33.80816982 |
| C | 12.60757373 | 10.89098216 | 33.80816982 |
| C | 17.21242622 | 10.89098216 | 33.80816982 |
| C | 11.18459608 | 12.84954283 | 33.80816982 |
| C | 18.63540387 | 12.84954283 | 33.80816982 |

|   |             |             |             |
|---|-------------|-------------|-------------|
| C | 11.18459608 | 15.27045709 | 33.80816982 |
| C | 18.63540387 | 15.27045709 | 33.80816982 |
| C | 12.60757373 | 17.2290178  | 33.80816982 |
| C | 17.21242622 | 17.2290178  | 33.80816982 |
| C | 14.90999998 | 17.97712144 | 33.80816982 |
| C | 14.90999998 | 10.14287855 | 35.22914432 |
| C | 12.60757373 | 10.89098216 | 35.22914432 |
| C | 17.21242622 | 10.89098216 | 35.22914432 |
| C | 11.18459608 | 12.84954283 | 35.22914432 |
| C | 18.63540387 | 12.84954283 | 35.22914432 |
| C | 11.18459608 | 15.27045709 | 35.22914432 |
| C | 18.63540387 | 15.27045709 | 35.22914432 |
| C | 12.60757373 | 17.2290178  | 35.22914432 |
| C | 17.21242622 | 17.2290178  | 35.22914432 |
| C | 14.90999998 | 17.97712144 | 35.22914432 |
| C | 13.69954292 | 10.33459608 | 35.93963157 |
| C | 16.12045712 | 10.33459608 | 35.93963157 |
| C | 11.74098219 | 11.75757373 | 35.93963157 |
| C | 18.07901783 | 11.75757373 | 35.93963157 |
| C | 10.99287855 | 14.05999996 | 35.93963157 |
| C | 18.82712146 | 14.06       | 35.93963157 |
| C | 11.74098215 | 16.3624262  | 35.93963157 |
| C | 18.07901782 | 16.36242623 | 35.93963157 |
| C | 13.69954283 | 17.78540388 | 35.93963157 |
| C | 16.12045708 | 17.78540388 | 35.93963157 |
| C | 13.69954292 | 10.33459608 | 37.36060599 |
| C | 16.12045712 | 10.33459608 | 37.36060599 |
| C | 11.74098215 | 16.3624262  | 37.36060599 |
| C | 18.07901782 | 16.36242623 | 37.36060599 |
| C | 13.69954283 | 17.78540388 | 37.36060599 |
| C | 16.12045708 | 17.78540388 | 37.36060599 |
| C | 11.74098219 | 11.75757373 | 37.36060607 |
| C | 18.07901783 | 11.75757373 | 37.36060607 |
| C | 10.99287855 | 14.05999996 | 37.36060607 |
| C | 18.82712146 | 14.06       | 37.36060607 |
| C | 14.90999998 | 10.14287855 | 38.07109329 |
| C | 12.60757373 | 10.89098216 | 38.07109329 |
| C | 17.21242622 | 10.89098216 | 38.07109329 |
| C | 11.18459608 | 12.84954283 | 38.07109329 |
| C | 18.63540387 | 12.84954283 | 38.07109329 |
| C | 11.18459608 | 15.27045709 | 38.07109329 |
| C | 18.63540387 | 15.27045709 | 38.07109329 |
| C | 12.60757373 | 17.2290178  | 38.07109329 |
| C | 17.21242622 | 17.2290178  | 38.07109329 |

|   |             |             |             |
|---|-------------|-------------|-------------|
| C | 14.90999998 | 17.97712144 | 38.07109329 |
| C | 14.90999998 | 10.14287855 | 39.49206774 |
| C | 12.60757373 | 10.89098216 | 39.49206774 |
| C | 17.21242622 | 10.89098216 | 39.49206774 |
| C | 11.18459608 | 12.84954283 | 39.49206774 |
| C | 18.63540387 | 12.84954283 | 39.49206774 |
| C | 11.18459608 | 15.27045709 | 39.49206774 |
| C | 18.63540387 | 15.27045709 | 39.49206774 |
| C | 12.60757373 | 17.2290178  | 39.49206774 |
| C | 17.21242622 | 17.2290178  | 39.49206774 |
| C | 14.90999998 | 17.97712144 | 39.49206774 |
| C | 13.69954292 | 10.33459608 | 40.20255499 |
| C | 16.12045712 | 10.33459608 | 40.20255499 |
| C | 11.74098219 | 11.75757373 | 40.20255499 |
| C | 18.07901783 | 11.75757373 | 40.20255499 |
| C | 10.99287855 | 14.05999996 | 40.20255499 |
| C | 18.82712146 | 14.06       | 40.20255499 |
| C | 11.74098215 | 16.3624262  | 40.20255499 |
| C | 18.07901782 | 16.36242623 | 40.20255499 |
| C | 13.69954283 | 17.78540388 | 40.20255499 |
| C | 16.12045708 | 17.78540388 | 40.20255499 |
| C | 13.69954292 | 10.33459608 | 41.62352949 |
| C | 16.12045712 | 10.33459608 | 41.62352949 |
| C | 11.74098215 | 16.3624262  | 41.62352949 |
| C | 18.07901782 | 16.36242623 | 41.62352949 |
| C | 13.69954283 | 17.78540388 | 41.62352949 |
| C | 16.12045708 | 17.78540388 | 41.62352949 |
| C | 11.74098219 | 11.75757373 | 41.6235295  |
| C | 18.07901783 | 11.75757373 | 41.6235295  |
| C | 10.99287855 | 14.05999996 | 41.6235295  |
| C | 18.82712146 | 14.06       | 41.6235295  |
| C | 14.90999998 | 10.14287855 | 42.33401675 |
| C | 12.60757373 | 10.89098216 | 42.33401675 |
| C | 17.21242622 | 10.89098216 | 42.33401675 |
| C | 11.18459608 | 12.84954283 | 42.33401675 |
| C | 18.63540387 | 12.84954283 | 42.33401675 |
| C | 11.18459608 | 15.27045709 | 42.33401675 |
| C | 18.63540387 | 15.27045709 | 42.33401675 |
| C | 12.60757373 | 17.2290178  | 42.33401675 |
| C | 17.21242622 | 17.2290178  | 42.33401675 |
| C | 14.90999998 | 17.97712144 | 42.33401675 |
| C | 14.90999998 | 10.14287855 | 43.75499125 |
| C | 12.60757373 | 10.89098216 | 43.75499125 |
| C | 17.21242622 | 10.89098216 | 43.75499125 |

|   |             |             |             |
|---|-------------|-------------|-------------|
| C | 11.18459608 | 12.84954283 | 43.75499125 |
| C | 18.63540387 | 12.84954283 | 43.75499125 |
| C | 11.18459608 | 15.27045709 | 43.75499125 |
| C | 18.63540387 | 15.27045709 | 43.75499125 |
| C | 12.60757373 | 17.2290178  | 43.75499125 |
| C | 17.21242622 | 17.2290178  | 43.75499125 |
| C | 14.90999998 | 17.97712144 | 43.75499125 |
| C | 13.69954292 | 10.33459608 | 44.4654785  |
| C | 16.12045712 | 10.33459608 | 44.4654785  |
| C | 11.74098219 | 11.75757373 | 44.4654785  |
| C | 18.07901783 | 11.75757373 | 44.4654785  |
| C | 10.99287855 | 14.05999996 | 44.4654785  |
| C | 18.82712146 | 14.06       | 44.4654785  |
| C | 11.74098215 | 16.3624262  | 44.4654785  |
| C | 18.07901782 | 16.36242623 | 44.4654785  |
| C | 13.69954283 | 17.78540388 | 44.4654785  |
| C | 16.12045708 | 17.78540388 | 44.4654785  |
| C | 13.69954292 | 10.33459608 | 45.88645292 |
| C | 16.12045712 | 10.33459608 | 45.88645292 |
| C | 11.74098215 | 16.3624262  | 45.88645292 |
| C | 18.07901782 | 16.36242623 | 45.88645292 |
| C | 13.69954283 | 17.78540388 | 45.88645292 |
| C | 16.12045708 | 17.78540388 | 45.88645292 |
| C | 11.74098219 | 11.75757373 | 45.88645292 |
| C | 18.07901783 | 11.75757373 | 45.88645292 |
| C | 10.99287855 | 14.05999996 | 45.88645292 |
| C | 18.82712146 | 14.06       | 45.88645292 |
| C | 14.90999998 | 10.14287855 | 46.59694017 |
| C | 12.60757373 | 10.89098216 | 46.59694017 |
| C | 17.21242622 | 10.89098216 | 46.59694017 |
| C | 11.18459608 | 12.84954283 | 46.59694017 |
| C | 18.63540387 | 12.84954283 | 46.59694017 |
| C | 11.18459608 | 15.27045709 | 46.59694017 |
| C | 18.63540387 | 15.27045709 | 46.59694017 |
| C | 12.60757373 | 17.2290178  | 46.59694017 |
| C | 17.21242622 | 17.2290178  | 46.59694017 |
| C | 14.90999998 | 17.97712144 | 46.59694017 |
| C | 0.71        | 7.0228785   | 1.84462799  |
| C | 3.54999997  | 7.0228785   | 1.84462799  |
| C | 4.96999997  | 7.0228785   | 1.84462799  |
| C | 7.80999994  | 7.0228785   | 1.84462799  |
| C | 9.23        | 7.0228785   | 1.84462799  |
| C | 12.07       | 7.0228785   | 1.84462799  |
| C | 13.49       | 7.0228785   | 1.84462799  |

|   |             |           |             |
|---|-------------|-----------|-------------|
| C | 16.32999999 | 7.0228785 | 1.84462799  |
| C | 17.75000001 | 7.0228785 | 1.84462799  |
| C | 20.58999998 | 7.0228785 | 1.84462799  |
| C | 22.01       | 7.0228785 | 1.84462799  |
| C | 24.85       | 7.0228785 | 1.84462799  |
| C | 26.26999998 | 7.0228785 | 1.84462799  |
| C | 29.10999998 | 7.0228785 | 1.84462799  |
| C | 1.41999999  | 7.0228785 | 0.61487192  |
| C | 2.83999998  | 7.0228785 | 0.61487192  |
| C | 5.67999996  | 7.0228785 | 0.61487192  |
| C | 7.09999994  | 7.0228785 | 0.61487192  |
| C | 9.93999999  | 7.0228785 | 0.61487192  |
| C | 11.35999999 | 7.0228785 | 0.61487192  |
| C | 14.19999999 | 7.0228785 | 0.61487192  |
| C | 15.61999999 | 7.0228785 | 0.61487192  |
| C | 18.46000001 | 7.0228785 | 0.61487192  |
| C | 19.87999999 | 7.0228785 | 0.61487192  |
| C | 22.71999999 | 7.0228785 | 0.61487192  |
| C | 24.14       | 7.0228785 | 0.61487192  |
| C | 26.98       | 7.0228785 | 0.61487192  |
| C | 28.39999999 | 7.0228785 | 0.61487192  |
| C | 1.41999999  | 7.0228785 | 57.43723631 |
| C | 2.83999998  | 7.0228785 | 57.43723631 |
| C | 5.67999996  | 7.0228785 | 57.43723631 |
| C | 7.09999994  | 7.0228785 | 57.43723631 |
| C | 9.93999999  | 7.0228785 | 57.43723631 |
| C | 11.35999999 | 7.0228785 | 57.43723631 |
| C | 14.19999999 | 7.0228785 | 57.43723631 |
| C | 15.61999999 | 7.0228785 | 57.43723631 |
| C | 18.46000001 | 7.0228785 | 57.43723631 |
| C | 19.87999999 | 7.0228785 | 57.43723631 |
| C | 22.71999999 | 7.0228785 | 57.43723631 |
| C | 24.14       | 7.0228785 | 57.43723631 |
| C | 26.98       | 7.0228785 | 57.43723631 |
| C | 28.39999999 | 7.0228785 | 57.43723631 |
| C | 0.71        | 7.0228785 | 58.66699239 |
| C | 3.54999997  | 7.0228785 | 58.66699239 |
| C | 4.96999997  | 7.0228785 | 58.66699239 |
| C | 7.80999994  | 7.0228785 | 58.66699239 |
| C | 9.23        | 7.0228785 | 58.66699239 |
| C | 12.07       | 7.0228785 | 58.66699239 |
| C | 13.49       | 7.0228785 | 58.66699239 |
| C | 16.32999999 | 7.0228785 | 58.66699239 |
| C | 17.75000001 | 7.0228785 | 58.66699239 |

|   |             |           |             |
|---|-------------|-----------|-------------|
| C | 20.58999998 | 7.0228785 | 58.66699239 |
| C | 22.01       | 7.0228785 | 58.66699239 |
| C | 24.85       | 7.0228785 | 58.66699239 |
| C | 26.26999998 | 7.0228785 | 58.66699239 |
| C | 29.10999998 | 7.0228785 | 58.66699239 |
| C | 1.41999999  | 7.0228785 | 59.8967363  |
| C | 2.83999998  | 7.0228785 | 59.8967363  |
| C | 5.67999996  | 7.0228785 | 59.8967363  |
| C | 7.09999994  | 7.0228785 | 59.8967363  |
| C | 9.93999999  | 7.0228785 | 59.8967363  |
| C | 11.35999999 | 7.0228785 | 59.8967363  |
| C | 14.19999999 | 7.0228785 | 59.8967363  |
| C | 15.61999999 | 7.0228785 | 59.8967363  |
| C | 18.46000001 | 7.0228785 | 59.8967363  |
| C | 19.87999999 | 7.0228785 | 59.8967363  |
| C | 22.71999999 | 7.0228785 | 59.8967363  |
| C | 24.14       | 7.0228785 | 59.8967363  |
| C | 26.98       | 7.0228785 | 59.8967363  |
| C | 28.39999999 | 7.0228785 | 59.8967363  |
